# Supplementary material
Source: MDPI journal article supplement (https://www.mdpi.com/2304-6740/11/6/260)
Supplement: s1 [file s1]

## **The Fast Formation of a Highly Active Homogeneous Catalytic System upon the Soft Leaching of Pd Species from a Heterogeneous Pd/C Precursor**

Alexey S. Galushko, Valentina V. Ilyushenkova, Julia V. Burykina, Ruslan R. Shaydullin,  
Evgeniy O. Pentsak, and Valentine P. Ananikov\*

*Zelinsky Institute of Organic Chemistry, Russian Academy of Sciences, Leninsky Prospect 47, Moscow,  
119991, Russia. \*E-mail: val@ioc.ac.ru*

### **Table of content**

|                        |    |
|------------------------|----|
| XPS measurements ..... | S2 |
| ESI-MS study .....     | S4 |

## XPS measurements

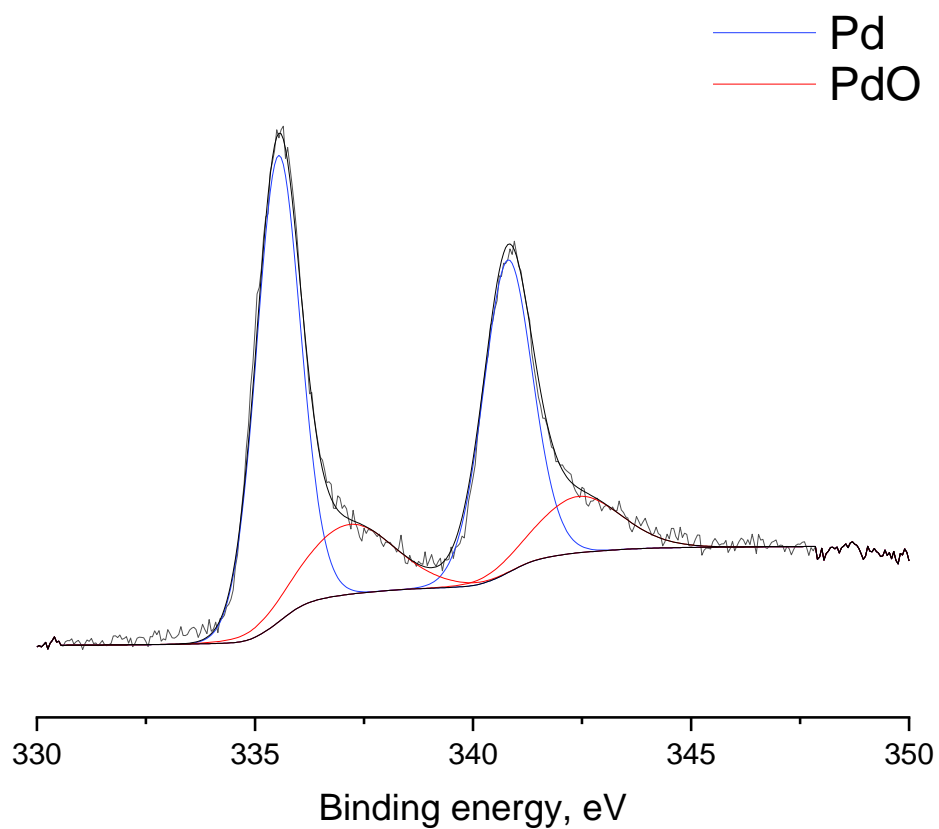

**Figure S1.** XPS spectrum of palladium.

**Sample:** 1 wt.% Pd/graphite. Pd was deposited from  $\text{Pd}_2\text{dba}_3$  in  $\text{CHCl}_3$ .

| State of palladium | Ratio, mol.% |
|--------------------|--------------|
| Pd(0)              | 76.3         |
| PdO                | 23.7         |

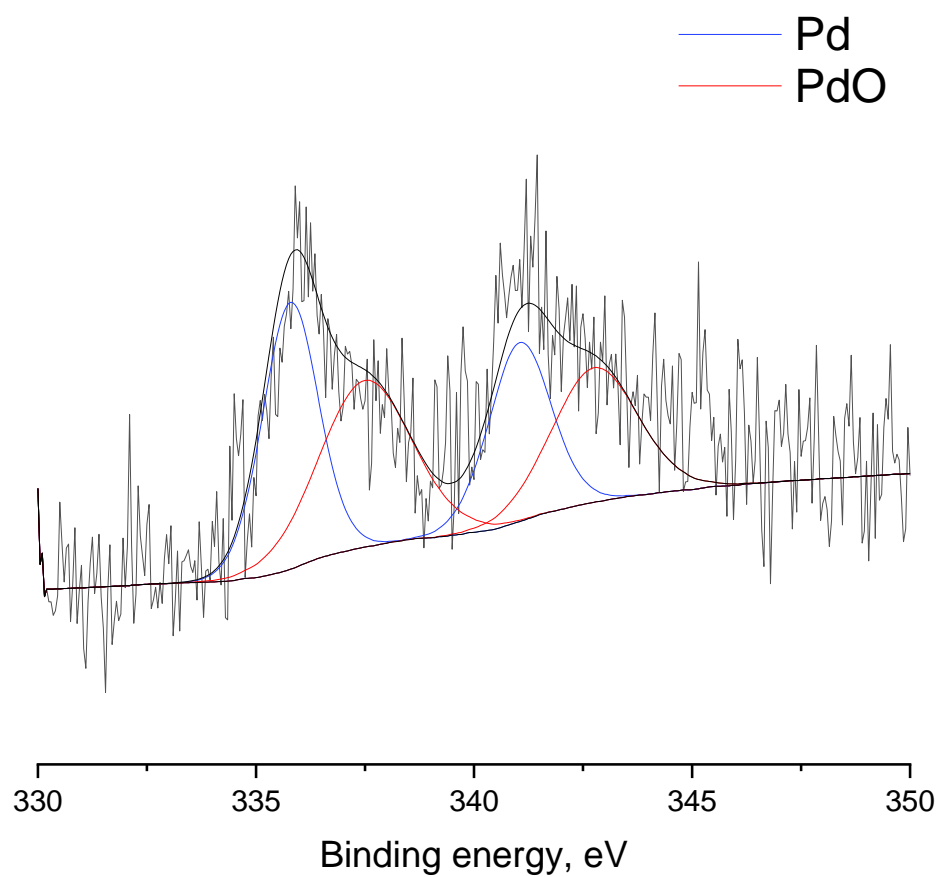

**Figure S2.** XPS spectrum of palladium.

**Sample:** 1 wt.% Pd/MWCNTs. Pd was deposited from  $\text{Pd}_2\text{dba}_3$  in  $\text{CHCl}_3$ .

| State of palladium | Ratio, mol.% |
|--------------------|--------------|
| Pd(0)              | 49.0         |
| PdO                | 51.0         |

## ESI-MS study

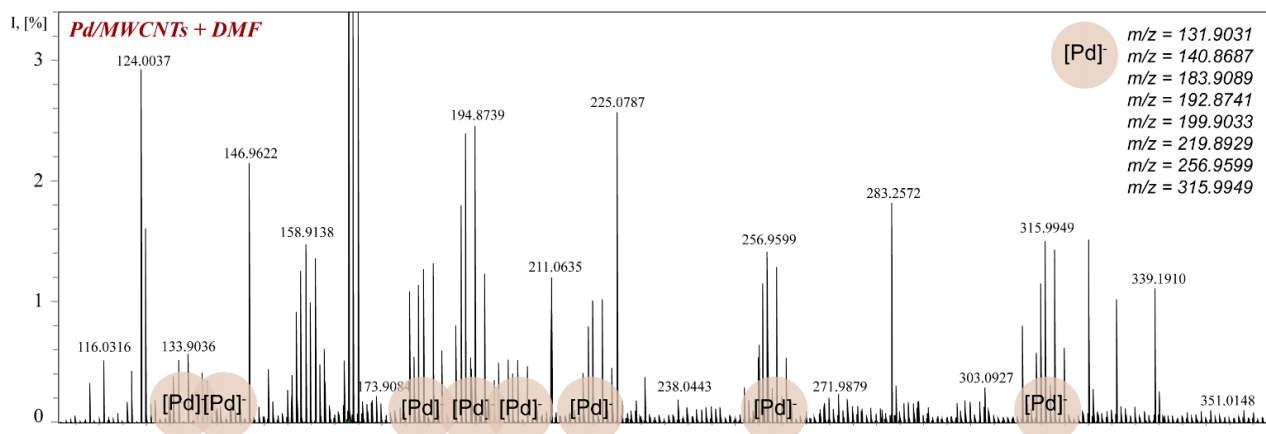

**Figure S3.** Full ESI-MS spectra in negative ion mode: ions formed in 1 wt.% Pd/MWCNTs suspension in DMF.

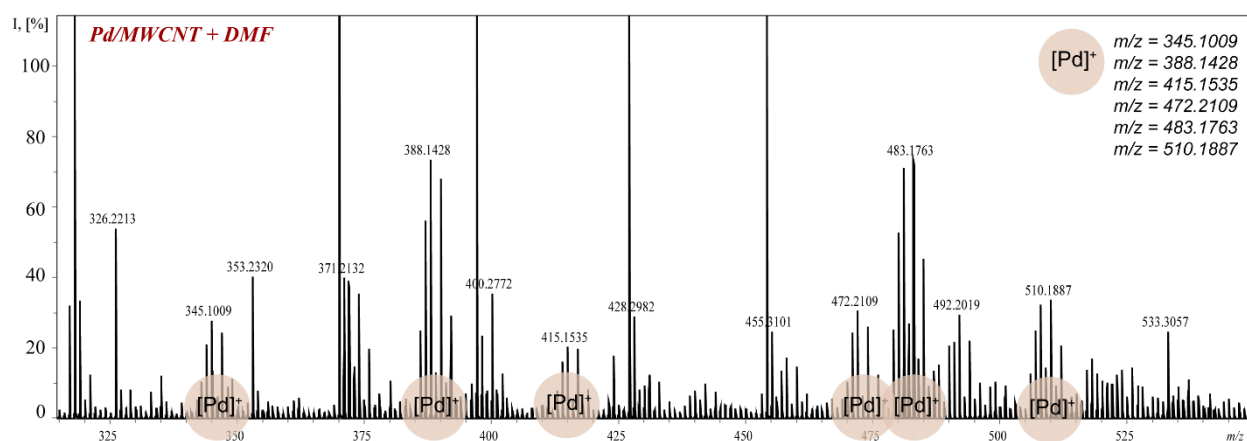

**Figure S4.** Full ESI-MS spectra in positive ion mode: ions formed in 1 wt.% Pd/MWCNTs suspension in DMF.

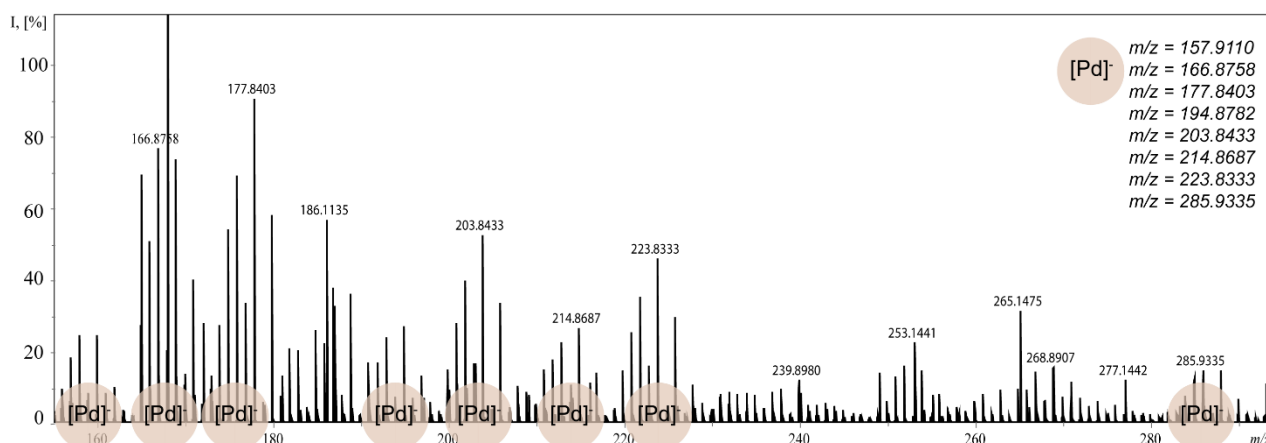

**Figure S5.** Full ESI-MS spectra in negative ion mode: ions formed in 1 wt.% Pd/graphite suspension in DMF.

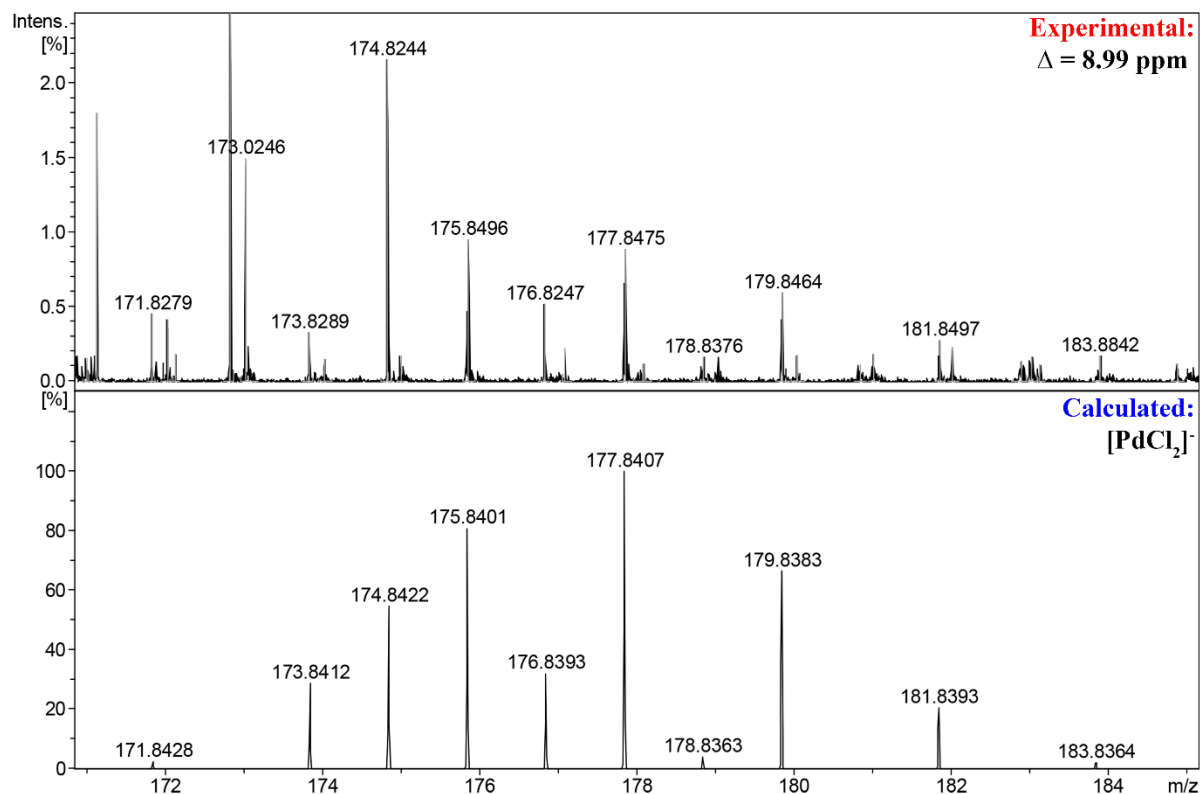

**Figure S6.** ESI-MS spectra in negative ion mode: ions formed in Pd/graphite rod (1 h of heating). Experimental (top) and calculated (bottom) spectra of  $[\text{PdCl}_2]^-$ .

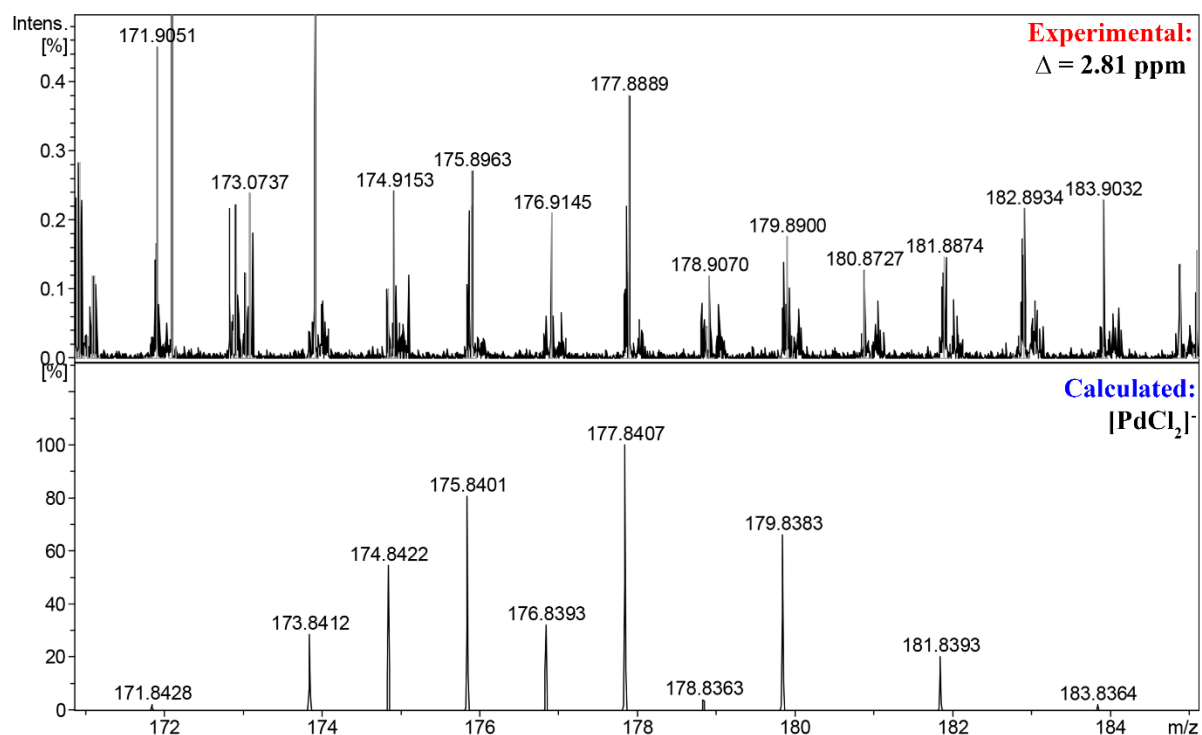

**Figure S7.** ESI-MS spectra in negative ion mode: ions formed in Pd/graphite rod (2 h of heating). Experimental (top) and calculated (bottom) spectra of  $[\text{PdCl}_2]^-$ .

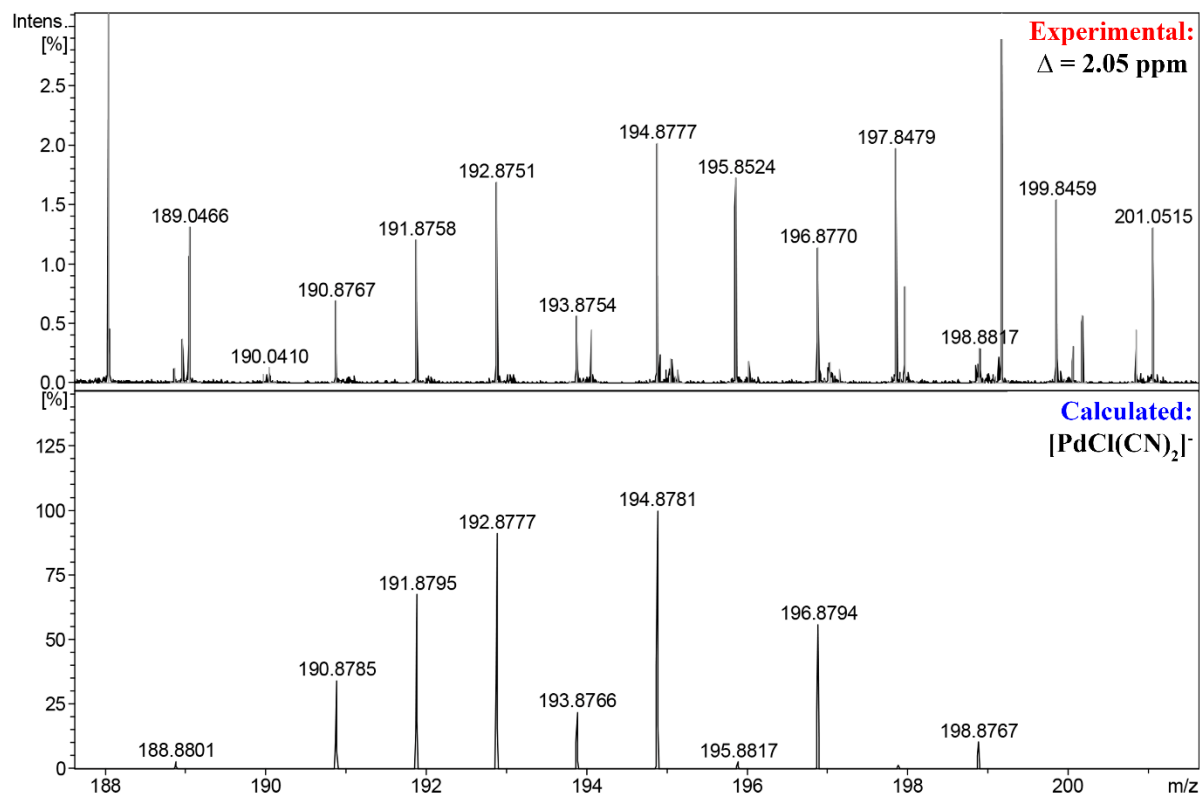

**Figure S8.** ESI-MS spectra in negative ion mode: ions formed in Pd/graphite rod (1 h of heating). Experimental (top) and calculated (bottom) spectra of  $[\text{PdCl}(\text{CN})_2]^-$ .

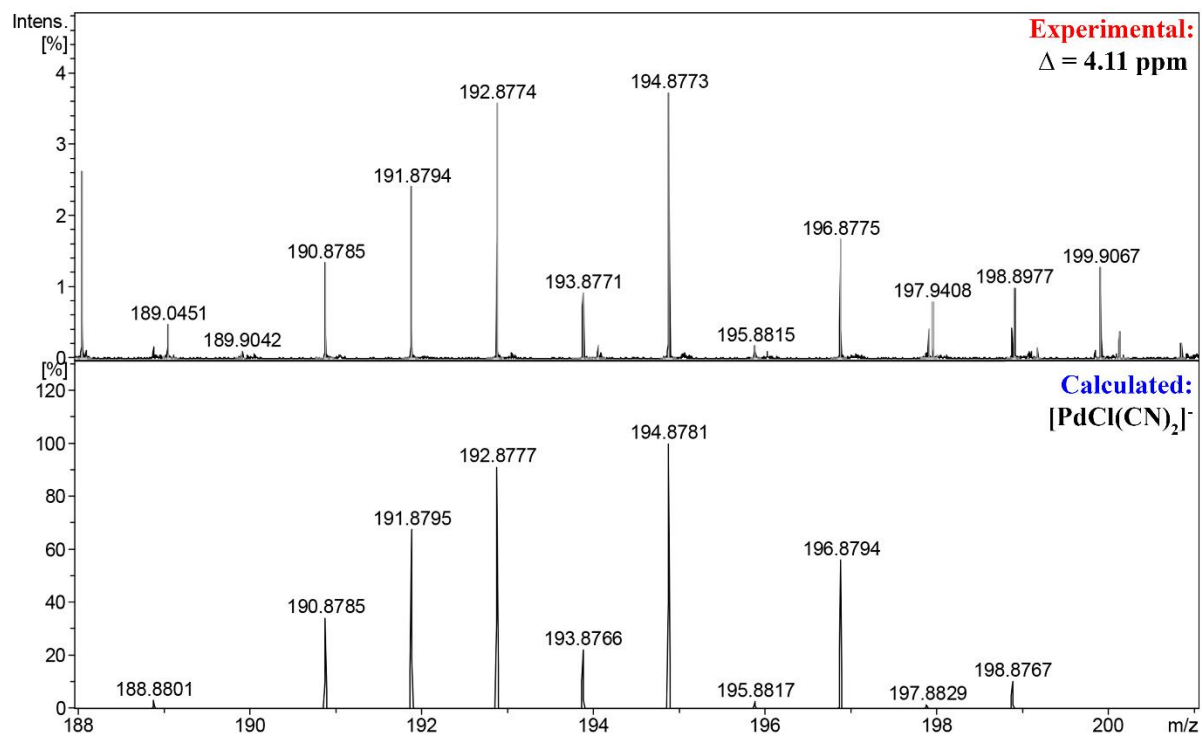

**Figure S9.** ESI-MS spectra in negative ion mode: ions formed in Pd/graphite rod (2 h of heating). Experimental (top) and calculated (bottom) spectra of  $[\text{PdCl}(\text{CN})_2]^-$ .

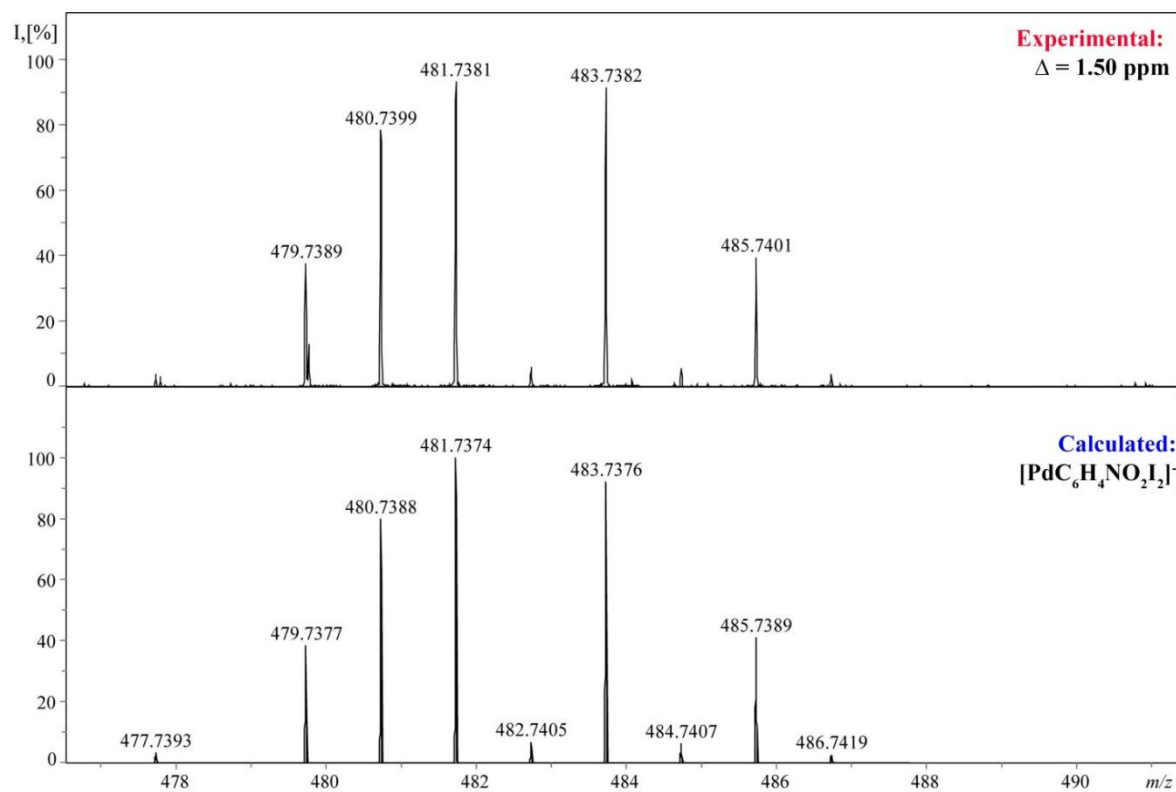

**Figure S10.** ESI-MS spectra in negative ion mode:  $[\text{Pd}(\text{C}_6\text{H}_4\text{NO}_2)_2\text{I}_2]^-$  found in reaction mixture in the Mizoroki-Heck reaction with leached palladium species to DMF.

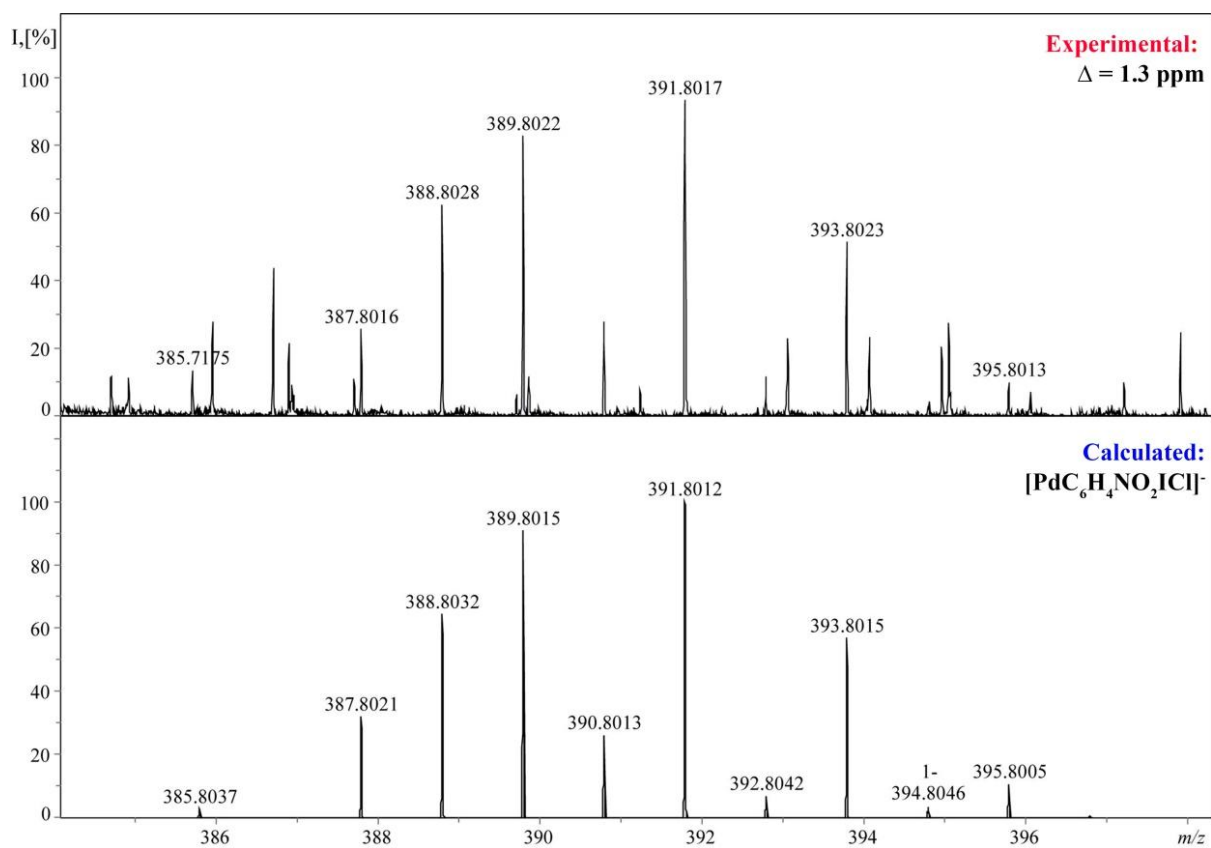

**Figure S11.** ESI-MS spectra in negative ion mode:  $[\text{Pd}(\text{C}_6\text{H}_4\text{NO}_2)\text{ICl}]^-$  found in Mizoroki-Heck reaction with leached palladium species to DMF.

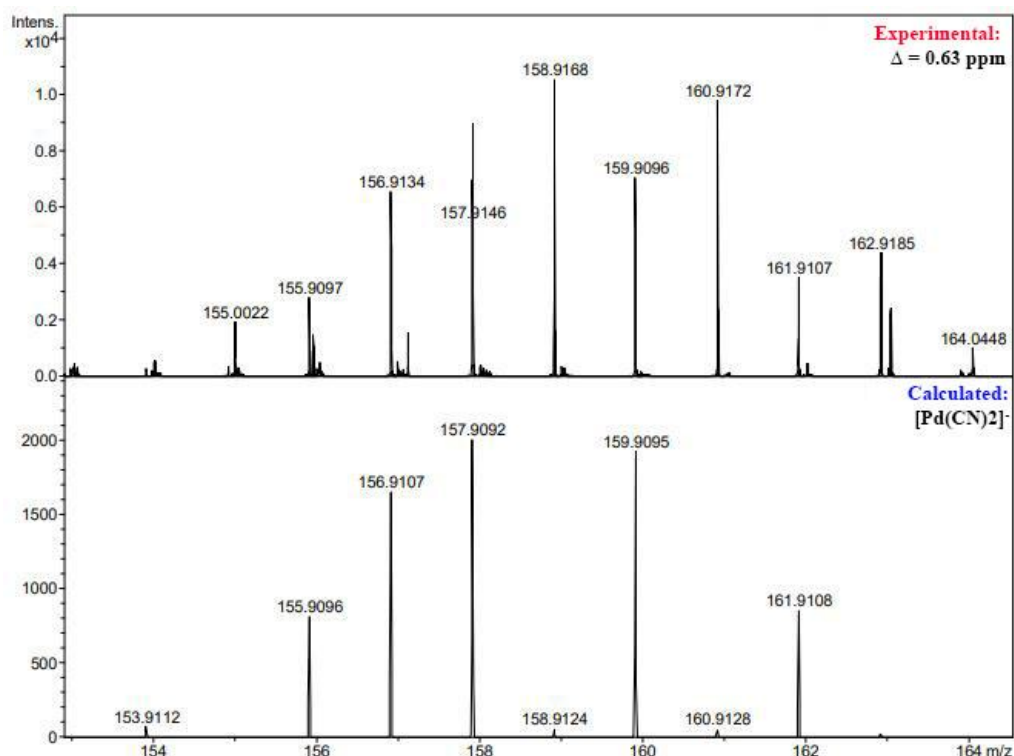

**Figure S12.** ESI-MS spectra in negative ion mode: Experimental (top) and calculated (bottom) spectra of  $[\text{Pd}(\text{CN})_2]^-$ .

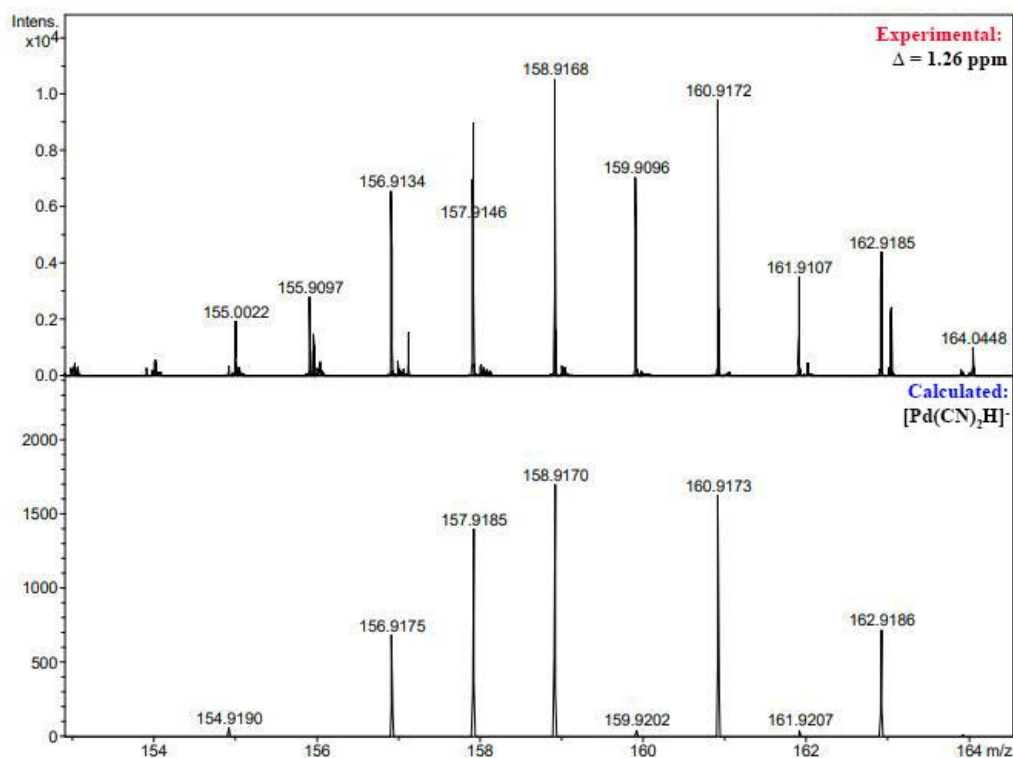

**Figure S13.** ESI-MS spectra in negative ion mode: Experimental (top) and calculated (bottom) spectra of  $[\text{Pd}(\text{CN})_2\text{H}]^-$ .



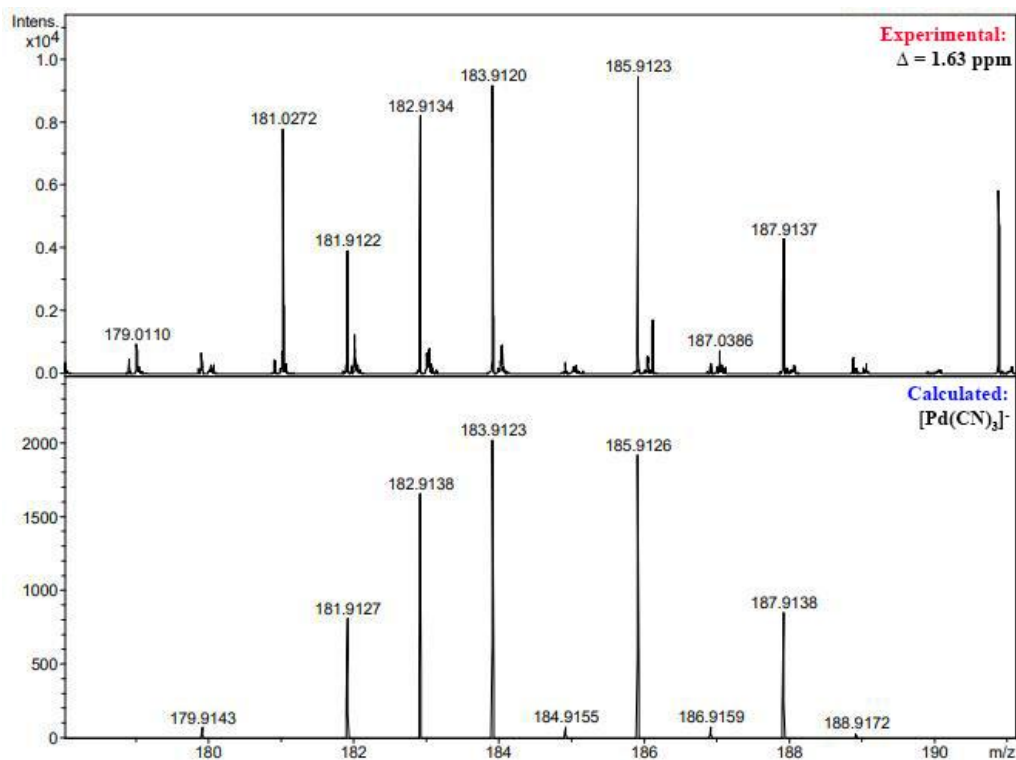

**Figure S14.** ESI-MS spectra in negative ion mode: Experimental (top) and calculated (bottom) spectra of  $[\text{Pd}(\text{CN})_3]^-$ .

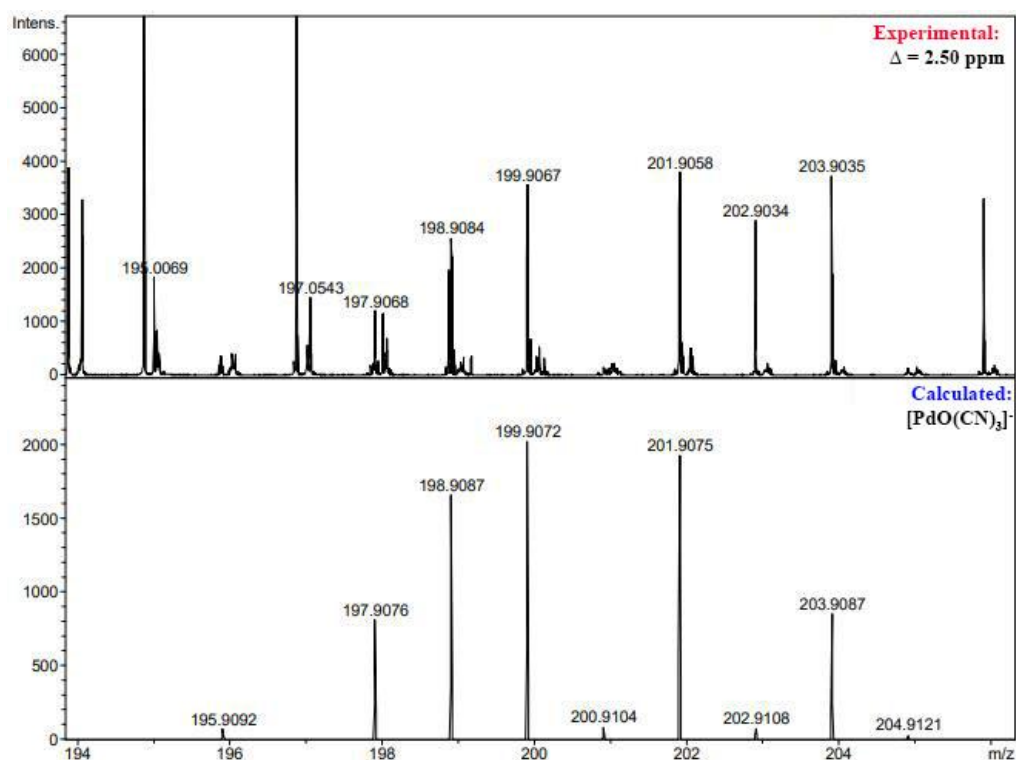

**Figure S15.** ESI-MS spectra in negative ion mode: Experimental (top) and calculated (bottom) spectra of  $[\text{PdO}(\text{CN})_3]^-$ .

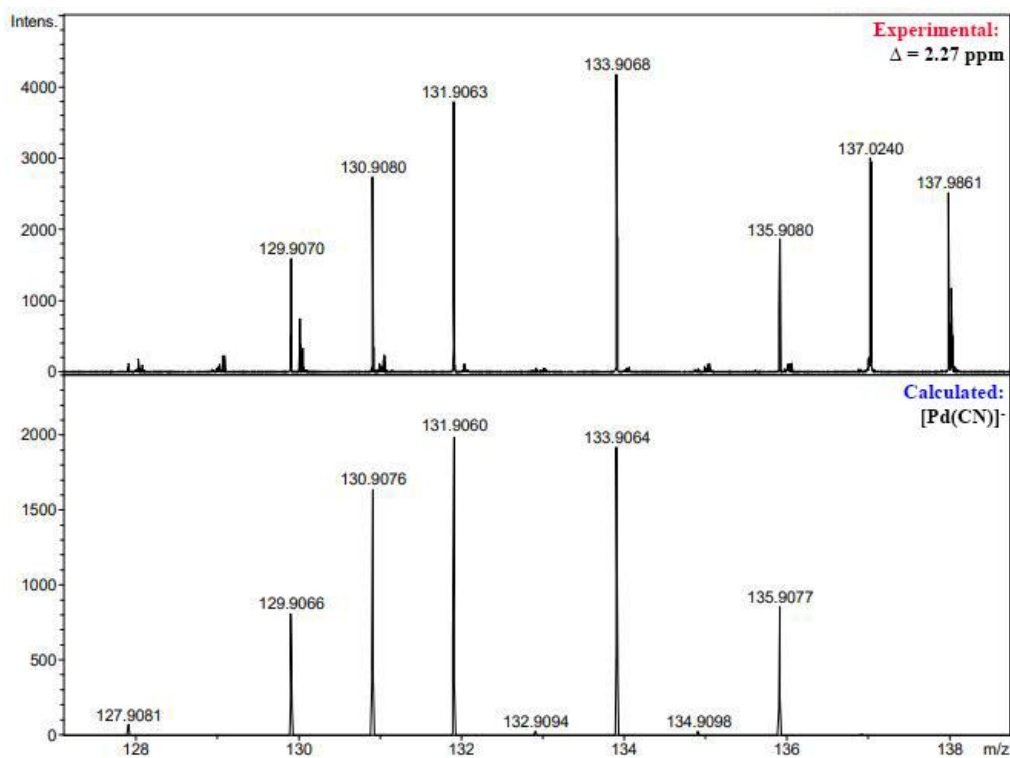

**Figure S16.** ESI-MS spectra in negative ion mode: Experimental (top) and calculated (bottom) of  $[\text{Pd}(\text{CN})]^-$ .

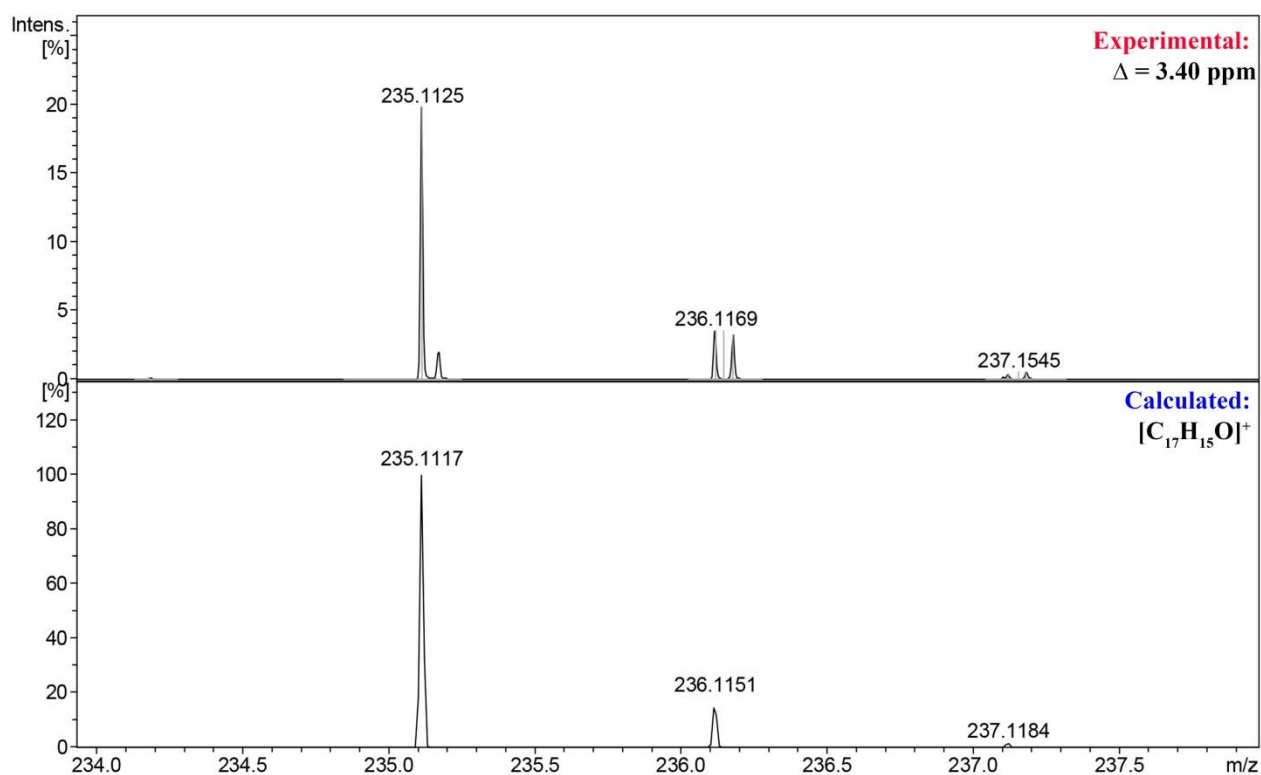

**Figure S17.** ESI-MS spectra in positive ion mode: Experimental (top) and calculated (bottom) of dibenzylideneacetone found in mixture Pd/MWCNT in DMF.
